# Supplementary material for: Room temperature borylation of arenes and heteroarenes using stoichiometric amounts of pinacolborane catalyzed by iridium complexes in an inert solventElectronic supplementary information (ESI) available: experimental procedures and spectral analyses of products. See http://www.rsc.org/suppdata/cc/b3/b311103b/
Source: Royal Society of Chemistry journal article supplement (doi:10.1039/b311103b), 2003-01-01
Supplement: b311103b.doc [file b311103b.doc]

Room temperature borylation of arenes and heteroarenes using stoichiometric amounts of pinacolborane catalyzed by iridium complexes in an inert solvent

Tatsuo Ishiyama,* Yusuke Nobuta and Norio Miyaura*

Division of Molecular Chemistry, Graduate School of Engineering, Hokkaido University, Sapporo 060-8628, Japan

John F. Hartwig

Department of Chemistry, Yale University, P.O. Box 208107, New Haven, Connecticut 06520-8107, USA

Electronic Supplementary Information (ESI)

**General Methods.** All the experiments were carried out under a nitrogen atmosphere. 1H and 13C NMR spectra were recorded in CDCl3 solutions using a JEOL JNM-A400II spectrometer (400 or 100 MHz) and Me4Si or residual protiated solvent as an internal standard. High-resolution mass spectra were obtained on a JEOL JMS-DX303. GC analyses were performed on a Hitachi G-3500 instrument equipped with a glass column (OV-101 on Uniport B, 2 m). Solvents, arenes, and hetroarenes were purified by distillation from appropriate drying agents. Pinacolborane was prepared by Knochel’s method1 and purified by distillation through a Widmer column. [Ir(OMe)(COD)]2,2 [Ir(OAc)(COD)]2,3 4,4’-bis(*N,N*-dimethylamino)-2,2’-bipyridine,4 4,4’-dimethoxy-2,2’-bipyridine,4 4,4’-dichloro-2,2’-bipyridine,4 and 4,4’-dinitro-2,2’-bipyridine5 were synthesized by the reported procedures. All of other compounds were used as received.

**General Procedure for Aromatic C-H Borylation by Pinacolborane (Table 1).** A 25-mL flask assembled a magnetic stirring bar, a septum inlet, a condenser, and a bubbler was charged with [Ir(OMe)(COD)]2 (0.015 mmol) and 4,4’-di-*tert*-butyl-2,2’-bipyridine (0.03 mmol), and then flushed with nitrogen. Dry hexane (6 mL), pinacolborane (1.1 mmol), and an arene or a heteroarene (1.0 mmol) were added, and the mixture was stirred at 25 °C for the period shown in Table 1. The reaction mixture was treated with water at room temperature, extracted with benzene, washed with brine, and dried over MgSO4. Kugelrohr distillation in vacuo gave an analytically pure sample.

**1,2-Dichloro-4-(4,4,5,5-tetramethyl-1,3,2-dioxaborolan-2-yl)benzene (Entry 1).** The purity determined by NMR and GC analyses: > 95%; 1H NMR  1.34 (s, 12 H), 7.44 (d, 1 H, *J* = 7.8 Hz), 7.60 (d, 1 H, *J* = 8.1 Hz), 7.87 (s, 1 H); 13C NMR  24.82, 84.31, 129.98, 132.23, 133.73, 135.46, 136.53; exact mass calcd for C12H15BCl2O2 272.0542, found 272.0534.

**1,4-Dichloro-2-(4,4,5,5-tetramethyl-1,3,2-dioxaborolan-2-yl)benzene (Entry 2).** The purity determined by NMR and GC analyses: > 95%; 1H NMR  1.37 (s, 12 H), 7.27 (d, 1 H, *J* = 8.1 Hz), 7.30 (dd, 1 H, *J* = 8.5 and 2.2 Hz), 7.65 (d, 1 H, *J* = 2.0 Hz); 13C NMR  24.75, 84.46, 130.68, 131.69, 132.08, 136.02, 137.7; exact mass calcd for C12H15BCl2O2 272.0542, found 272.0549.

**1,3-Dichloro-5-(4,4,5,5-tetramethyl-1,3,2-dioxaborolan-2-yl)benzene (Entry 3).** The purity determined by NMR and GC analyses: > 95%; 1H NMR  1.34 (s, 12 H), 7.43 (t, 1 H, *J* = 2.0 Hz), 7.65 (d, 2 H, *J* = 2.0 Hz); 13C NMR  24.81, 84.48, 131.05, 132.67, 134.69; exact mass calcd for C12H15BCl2O2 272.0542, found 272.0566.

**1-Chloro-3-iodo-5-(4,4,5,5-tetramethyl-1,3,2-dioxaborolan-2-yl)benzene (Entry 4).** The purity determined by NMR and GC analyses: > 95%; 1H NMR  1.34 (s, 12 H), 7.72 (d, 1 H, *J* = 1.5 Hz), 7.78 (t, 1 H, *J* = 1.2 Hz), 8.00 (s, 1 H); 13C NMR  24.81, 84.46, 94.18, 133.71, 134.70, 139.42, 141.42; exact mass calcd for C12H15BClIO2 363.9899, found 363.9880.

**Methyl 3-chloro-5-(4,4,5,5-tetramethyl-1,3,2-dioxaborolan-2-yl)benzoate (Entry 5).** The purity determined by NMR and GC analyses: > 95%; 1H NMR  1.35 (s, 12 H), 3.92 (s, 3 H), 7.95 (d, 1 H, *J* = 1.5 Hz), 8.09 (t, 1 H, *J* = 1.2 Hz), 8.33 (s, 1 H); 13C NMR  24.82, 52.30, 84.42, 131.32, 132.10, 133.70, 134.28, 138.79, 165.93; exact mass calcd for C14H18BClO4 296.0987, found 296.0993.

**3-Bromo-5-(4,4,5,5-tetramethyl-1,3,2-dioxaborolan-2-yl)benzotrifluoride (Entry 6).** The purity determined by NMR and GC analyses: > 95%; 1H NMR  1.36 (s, 12 H), 7.83 (s, 1 H,), 7.97 (s, 1 H), 8.10 (s, 1 H); 13C NMR  24.82, 84.66, 122.49, 123.26 (q, *J* = 272.9 Hz), 129.83 (q, *J* = 3.3 Hz), 130.80 (q, *J* = 4.1 Hz), 131.88 (q, *J* = 32.8 Hz), 140.82; exact mass calcd for C13H15BBrF3O2 350.0300, found 350.0309.

**3-Bromo-5-(4,4,5,5-tetramethyl-1,3,2-dioxaborolan-2-yl)benzonitrile (Entry 7).** The purity determined by NMR and GC analyses: > 95%; 1H NMR  1.35 (s, 12 H), 7.85 (s, 1 H), 8.01 (s, 1 H), 8.13 (s, 1 H); 13C NMR  24.81, 84.85, 113.77, 117.32, 122.60, 136.70, 136.74, 141.73; exact mass calcd for C13H15BBrNO2 307.0379, found 307.0387.

**3-Trifluoromethyl-5-(4,4,5,5-tetramethyl-1,3,2-dioxaborolan-2-yl)benzonitrile (Entry 8).** The purity determined by NMR and GC analyses: > 95%; 1H NMR  1.37 (s, 12 H), 7.98 (s, 1 H), 8.26 (s, 2 H); 13C NMR  24.81, 85.03, 112.96, 117.39, 123.02 (q, *J* = 272.6 Hz), 131.01 (q, *J* = 4.1 Hz), 131.30 (q, *J* = 33.6 Hz), 135.22 (q, *J* = 3.3 Hz), 141.33; exact mass calcd for C14H15BF3NO2 297.1148, found 297.1153.

**3-Trifluoromethyl-5-(4,4,5,5-tetramethyl-1,3,2-dioxaborolan-2-yl)anisole (Entry 9).** The purity determined by NMR and GC analyses: > 95%; 1H NMR  1.35 (s, 12 H), 3.86 (s, 3 H), 7.21 (s, 1 H), 7.48 (d, 1 H, *J* = 2.2 Hz), 7.65 (s, 1 H); 13C NMR  24.81, 55.52, 84.29, 114.10 (q, *J* = 3.3 Hz), 122.50, 123.43 (q, *J* = 3.3 Hz), 124.01 (q, *J* = 272.6 Hz), 131.34 (q, *J* = 32.0 Hz), 159.16; exact mass calcd for C14H18BF3O3 302.1301, found 302.1314.

**2-(4,4,5,5-Tetramethyl-1,3,2-dioxaborolan-2-yl)indole (Entry 10).** The purity determined by NMR and GC analyses: > 95%; 1H NMR  1.36 (s, 12 H), 7.09 (t, 1 H, *J* = 7.7 Hz), 7.11 (s, 1 H), 7.23 (t, 1 H, *J* = 8.3 Hz), 7.38 (d, 1 H, *J* = 8.3 Hz), 7.67 (d, 1 H, *J* = 7.8 Hz), 8.56 (br s, 1 H); 13C NMR 24.78, 84.13, 111.25, 113.83, 119.75, 121.57, 123.59, 128.24, 138.18; exact mass calcd for C14H18BNO2 243.1431, found 243.1433.

**2-(4,4,5,5-Tetramethyl-1,3,2-dioxaborolan-2-yl)benzo[*b*]furan (Entry 11).** The purity determined by NMR and GC analyses: > 95%; 1H NMR  1.39 (s, 12 H), 7.23 (t, 1 H, *J* = 7.4 Hz), 7.34 (dt, 1 H, *J* = 1.2 and 7.8 Hz), 7.40 (s, 1 H), 7.57 (d, 1 H, *J* = 8.5 Hz), 7.63 (d, 1 H, *J* = 7.8 Hz); 13C NMR  24.73, 84.64, 111.92, 119.50, 121.84, 122.68, 125.89, 127.43, 157.45; exact mass calcd for C14H17BO3 244.1271, found 244.1278.

**2-(4,4,5,5-Tetramethyl-1,3,2-dioxaborolan-2-yl)benzo[*b*]thiophene (Entry 12).** The purity determined by NMR and GC analyses: > 95%; 1H NMR  1.38 (s, 12 H), 7.35 (ddd, 1 H, *J* = 1.7, 7.3, and 8.8 Hz), 7.37 (ddd, 1 H, *J* = 1.8, 7.1, and 9.0 Hz), 7.85 (dd, 1 H, *J* = 2.2 and 9.0 Hz), 7.89 (s, 1 H), 7.91 (dd, 1 H, *J* = 1.5 and 9.0 Hz); 13C NMR  24.79, 84.42, 122.50, 124.08, 124.35, 125.29, 134.47, 140.41, 143.67; exact mass calcd for C14H17BO2S 260.1042, found 260.1019.

**One-Pot Synthesis of methyl 4-(3,5-dichlorophenyl)benzoate via Borylation-Coupling Sequence (Scheme 2).** To a solution of 1,3-dichloro-5-(4,4,5,5-tetramethyl-1,3,2-dioxaborolan-2-yl)benzene resulted by the reaction of pinacolborane (1.43 mmol) with 1,3-dichlorobenzene (1.3 mmol) in dry hexane (2 mL) were added methyl 4-bromobenzoate (1.0 mmol), PdCl2(dppf) (0.03 mmol), K3PO4 (3.0 mmol), and DMF (4 mL), and the mixture was stirred at 60 °C for 1 h. The product was extracted with benzene, washed with water, and dried over MgSO4. Column chromatography over silica gel provided analytically puremethyl 4-(3,5-dichlorophenyl)benzoate: The purity determined by NMR and GC analyses: > 95%; 1H NMR  3.95 (s, 3 H), 7.39 (t, 1 H, *J* = 1.8 Hz), 7.49 (d, 2 H, *J* = 1.7 Hz), 7.61 (dt, 2 H, *J* = 8.5 and 1.8 Hz), 8.12 (dt, 2 H, *J* = 8.3 and 1.7 Hz); 13C NMR  52.25, 125.77, 127.03, 127.95, 130.04, 130.29, 135.49, 142.76, 142.95, 166.59; exact mass calcd for C14H10Cl2O2 280.0058, found 280.0047.

References

1. C. E. Tucker, J. Davidson and P. Knochel, *J. Org. Chem.*, 1992, **57**, 3482.

2. R. Uson, L. A. Oro and J. A. Cabeza, *Inorg. Synth.*, 1985, **23**, 126.

3. R. N. Haszeldine, R. J. Lunt and R. V. Parish, *J. Chem. Soc.* *A*, 1971, 3696.

4. P. Wehman, G. C. Dol, E. R. Moorman, P. C. J. Kamer, P. W. N. M. van Leeuwen, J. Fraanje and K. Goubitz, *Organometallics*, 1994, **13**, 4856.

5. D. Wenkert and R. B. Woodward, *J. Org. Chem.*, 1983, **48**, 283.
